# Supplementary material for: Metal–organic framework-derived nitrogen-doped carbon-confined CoSe2 anchored on multiwalled carbon nanotube networks as an anode for high-rate sodium-ion batteries
Source: Royal Society of Chemistry journal article supplement (doi:10.1039/d1dt04271h), 2022-01-01
Supplement: d1dt04271h1.pdf [file d1dt04271h1.pdf]

*Supporting Information*

**Metal-Organic Frameworks Derived Nitrogen-doped  
Carbon-Confined CoSe<sub>2</sub> Anchored on Multiwall Carbon  
Nanotube Networks as Anode for High-rate Sodium-ion  
Batteries**

*Lei Chen<sup>1</sup>, Xuefan Wang<sup>1</sup>, Yijiao Ding<sup>1</sup>, Yuke Li<sup>1,2</sup>, Shi-Bin Ren<sup>\*1</sup>, Mao Shen<sup>1</sup>, Yu-  
Xiang Chen<sup>1</sup>, Wei Li<sup>1</sup>, and De-Man Han<sup>\*\*1</sup>*

<sup>1</sup> School of Pharmaceutical Chemical and Materials Engineering, Taizhou University,  
Taizhou, 318000, P. R. China

<sup>2</sup> Department of Chemistry, Zhejiang Sci-Tech University, Hangzhou, 310018, P. R.  
China

\*Corresponding author.

E-mail address: [renshibin@tzc.edu.cn](mailto:renshibin@tzc.edu.cn); [hdm@tzc.edu.cn](mailto:hdm@tzc.edu.cn).

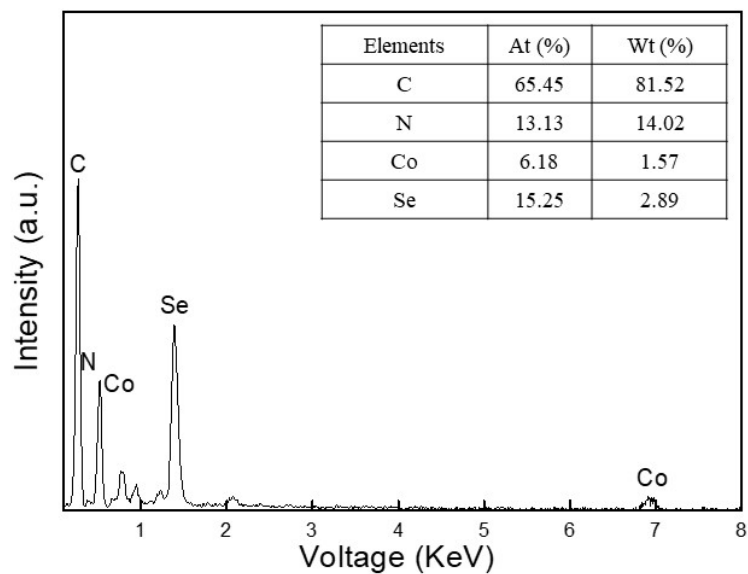

**Figure S1.** EDS spectrum of CoSe<sub>2</sub>@NC/MWCNTs (the inset table is atomic and weight ratios of Co, Se, N and C in CoSe<sub>2</sub>@NC/MWCNTs composite).

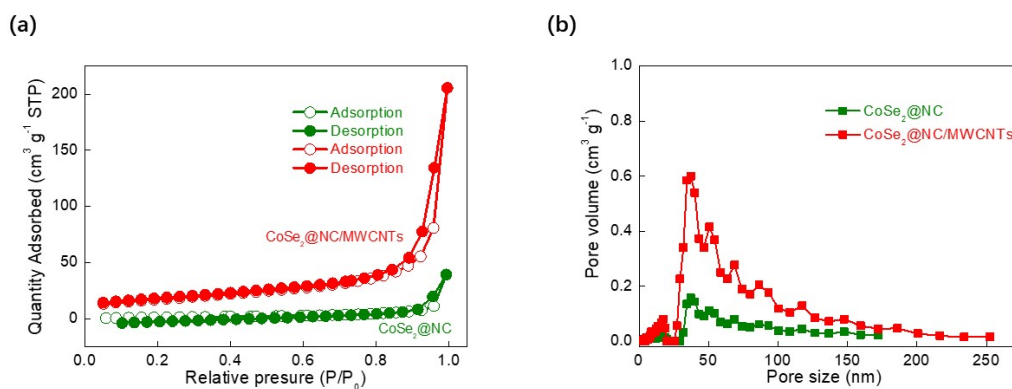

**Figure S2.** The nitrogen adsorption-desorption isotherms (a) and pore size distributions (b) of CoSe<sub>2</sub>@NC and CoSe<sub>2</sub>@NC/MWCNTs composites.

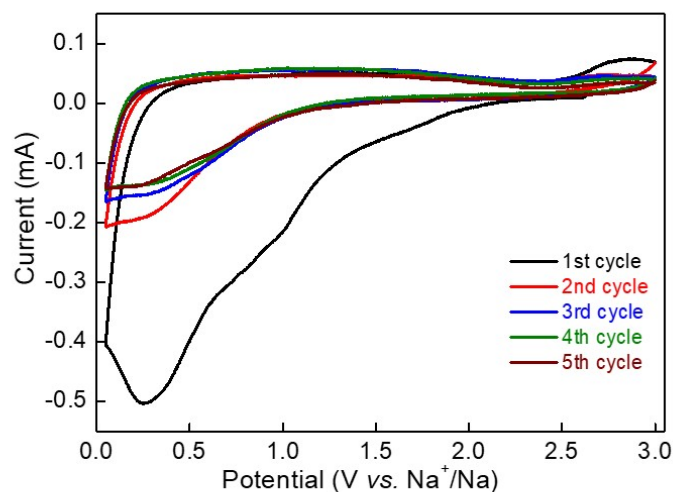

**Figure S3.** CV curves of the  $\text{CoSe}_2@\text{NC}$  electrode at scan rate of  $0.2 \text{ mV s}^{-1}$  for the initial fifth cycles.

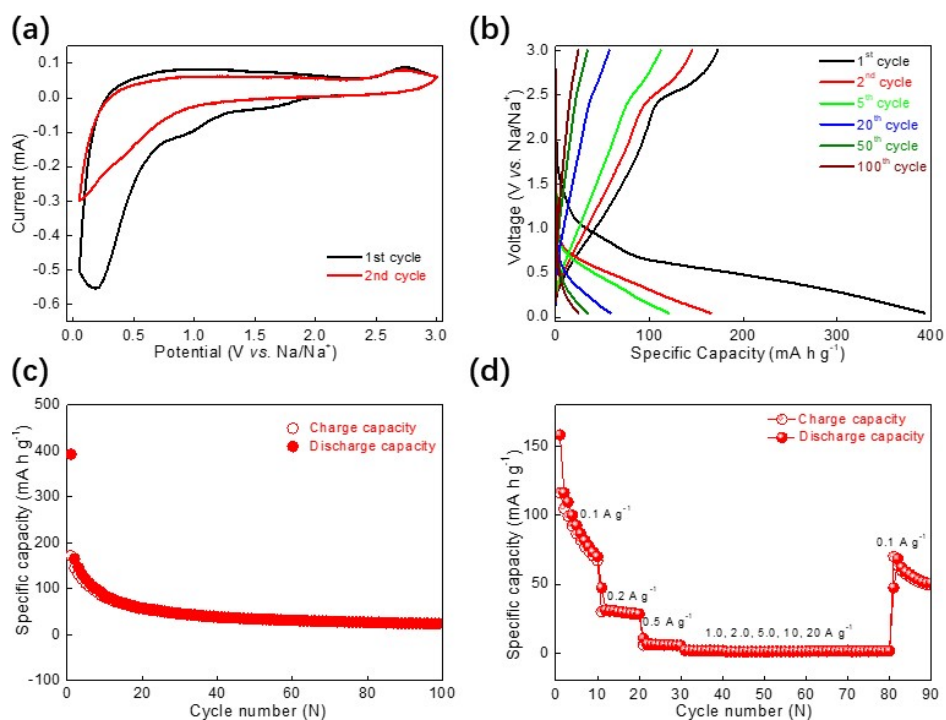

**Figure S4.** Electrochemical performance of  $\text{Co}@\text{NC}$  electrodes in the voltage window  $0.05\text{-}3.0 \text{ V}$  ( $\text{V vs. Na/Na}^+$ ): (a) CV curves at scan rate of  $0.1 \text{ mV s}^{-1}$  for the initial three cycles; (b) Galvanostatic discharge/charge profiles of  $1^{\text{st}}$ ,  $2^{\text{nd}}$ ,  $5^{\text{th}}$ ,  $20^{\text{th}}$ ,  $50^{\text{th}}$  and  $100^{\text{th}}$  cycles at a current density of  $0.1 \text{ A g}^{-1}$ ; (c) Cycling performance at  $0.1 \text{ A g}^{-1}$  over 100 cycles; (d) Rate capability at different current densities of  $0.1, 0.2, 0.5, 1.0, 2.0, 5.0, 10$  and  $20 \text{ A g}^{-1}$ .

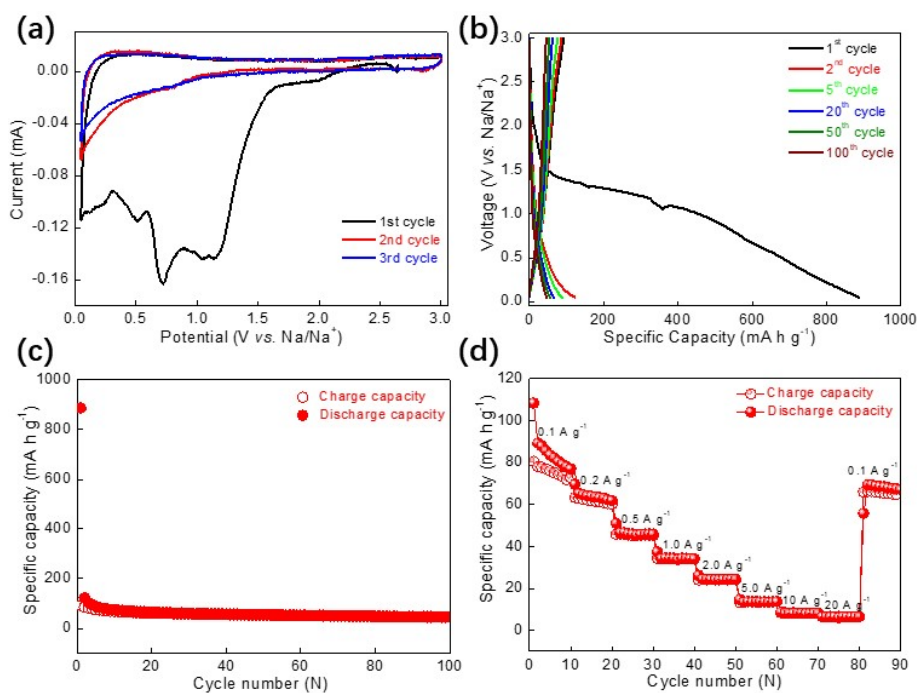

**Figure S5.** Electrochemical performance of MWCNTs electrodes in the voltage window 0.05-3.0

V (V vs. Na/Na<sup>+</sup>): (a) CV curves at scan rate of 0.1 mV s<sup>-1</sup> for the initial three cycles; (b) Galvanostatic discharge/charge profiles of 1<sup>st</sup>, 2<sup>nd</sup>, 5<sup>th</sup>, 20<sup>th</sup>, 50<sup>th</sup> and 100<sup>th</sup> cycles at a current density of 0.1 A g<sup>-1</sup>; (c) Cycling performance at 0.1 A g<sup>-1</sup> over 100 cycles; (d) Rate capability at different current densities of 0.1, 0.2, 0.5, 1.0, 2.0, 5.0, 10 and 20 A g<sup>-1</sup>.

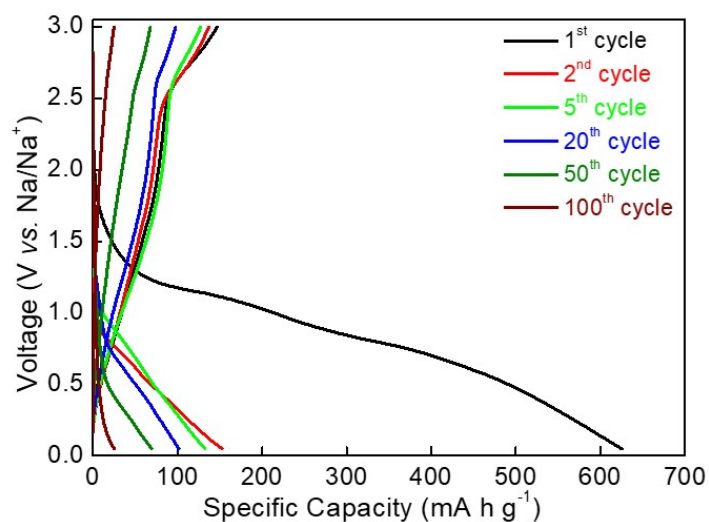

**Figure S6.** Galvanostatic discharge/charge profiles of the 1<sup>st</sup>, 2<sup>nd</sup>, 5<sup>th</sup>, 20<sup>th</sup>, 50<sup>th</sup> and 100<sup>th</sup> cycles for CoSe<sub>2</sub>@NC electrode at a current density of 0.2 A g<sup>-1</sup>.

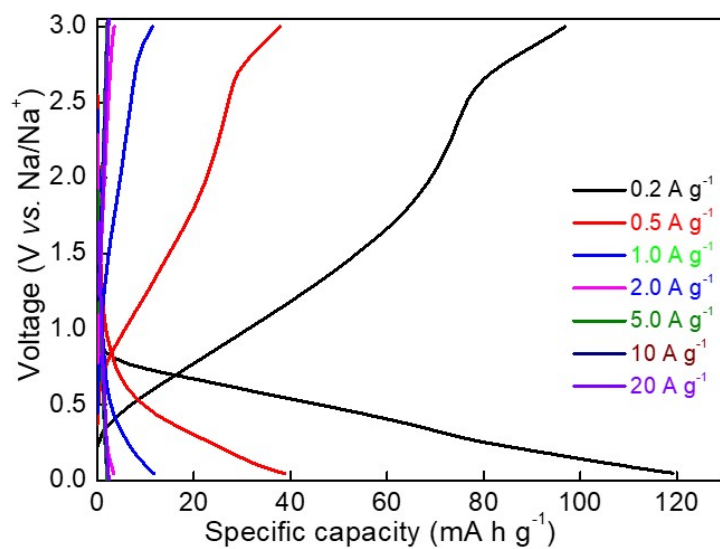

**Figure S7.** The charge/discharge profiles of CoSe<sub>2</sub>@NC at the various current densities.

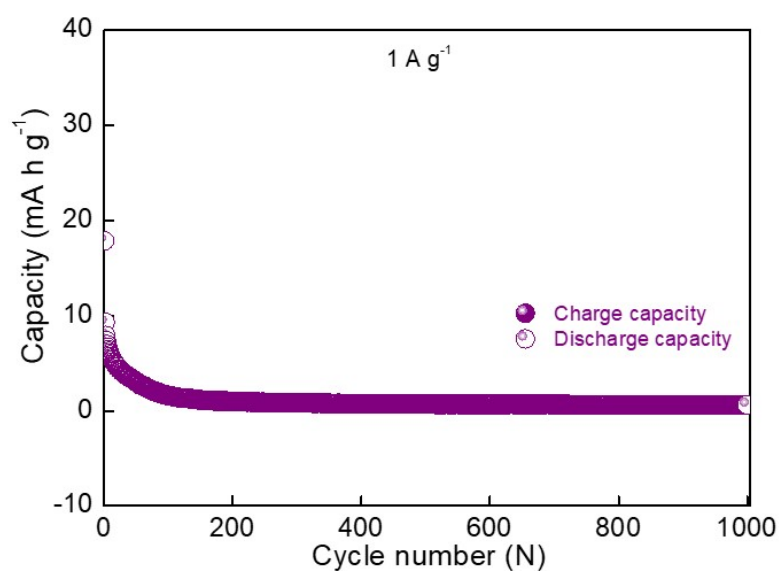

**Figure S8.** The long-cycling performance of CoSe<sub>2</sub>@NC electrode at 1.0A g<sup>-1</sup> over 1000 cycles.

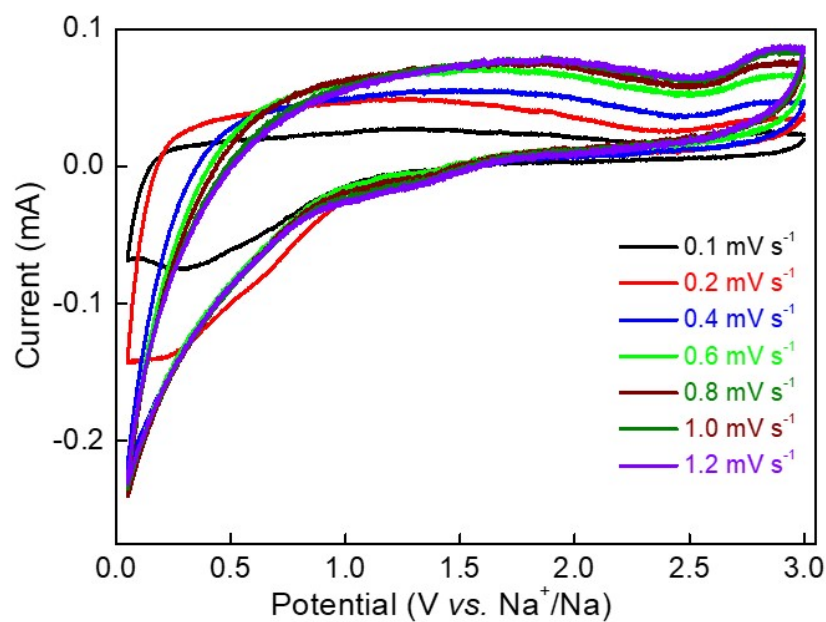

**Figure S9.** CV curves of CoSe<sub>2</sub>@NC electrode at various scan rates from 0.1 to 1.2 mV s<sup>-1</sup>.

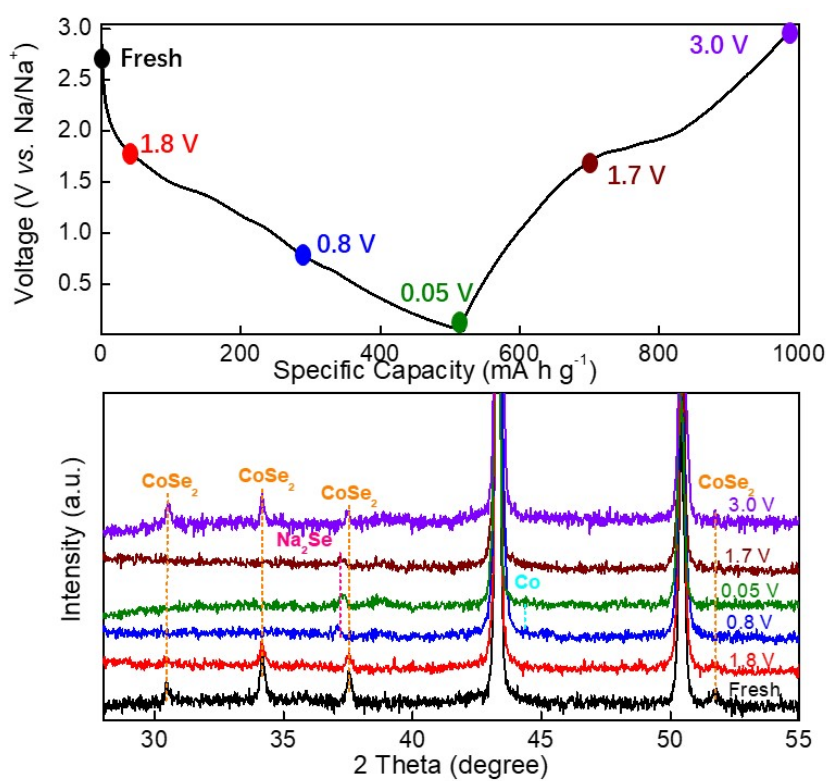

**Figure S10.** Ex-situ XRD analysis of the CoSe<sub>2</sub>@NC/MWCNTs electrode at different charge-discharge states.

**Table S1.** Elemental composition of CoSe<sub>2</sub>@NC/MWCNTs determined from XPS result.

| Element | Peak (eV) | Height   | FWHM (eV) | Atomic (%) |
|---------|-----------|----------|-----------|------------|
| C1s     | 284.8     | 58711.08 | 0.82      | 94.36      |
| Co2p    | 781.23    | 3084.39  | 3.09      | 0.54       |
| Se3d    | 55.99     | 445.16   | 1.33      | 1.04       |
| N1s     | 399.09    | 2177.8   | 1.2       | 4.04       |

**Table S2.** Comparison of the electrochemical performance of CoSe<sub>2</sub>@NC/MWCNTs composite with previously reported CoSe<sub>2</sub>-based anode for SIBs.

| Samples                        | Initial Capacity (mA h g <sup>-1</sup> ) | Long-cycling performance                   | Rate property (mA h g <sup>-1</sup> ) | Ref. |
|--------------------------------|------------------------------------------|--------------------------------------------|---------------------------------------|------|
| CoSe <sub>2</sub> @N-CA        | 496 (0.2 A g <sup>-1</sup> )             | 373 at 3.0 A g <sup>-1</sup> (2000 cycles) | 337 (10 A g <sup>-1</sup> )           | S1   |
| CoSe <sub>2</sub> @NC/MX       | 462 (0.5 A g <sup>-1</sup> )             | 317 at 0.5 A g <sup>-1</sup> (200 cycles)  | 343 (7 A g <sup>-1</sup> )            | S2   |
| N-CoSe <sub>2</sub> yss        | 602.3 (0.2 A g <sup>-1</sup> )           | 500 at 10 A g <sup>-1</sup> (1000 cycles)  | 431 (50 A g <sup>-1</sup> )           | S3   |
| CoSe <sub>2</sub> -CNS         | 535 (0.2 A g <sup>-1</sup> )             | 250 at 10 A g <sup>-1</sup> (2000 cycles)  | 352 (10 A g <sup>-1</sup> )           | S4   |
| CoSe <sub>2</sub> @C∩NC        | 389 (0.1 A g <sup>-1</sup> )             | 234 at 5 A g <sup>-1</sup> (2000 cycles)   | 146 (25 A g <sup>-1</sup> )           | S5   |
| CoSe <sub>2</sub> @NC          | 356 (0.2 A g <sup>-1</sup> )             | 384.3 at 2 A g <sup>-1</sup> (1800 cycles) | 276.4 (5 A g <sup>-1</sup> )          | S6   |
| CoSe <sub>2</sub> /N-CNF       | 371.8 (0.2 A g <sup>-1</sup> )           | 308 at 2 A g <sup>-1</sup> (1000 cycles)   | 295.1 (2 A g <sup>-1</sup> )          | S7   |
| CoSe <sub>2</sub> /NC          | 541 (0.1 A g <sup>-1</sup> )             | 390.5 at 5 A g <sup>-1</sup> (4000 cycles) | 376.5 (10 A g <sup>-1</sup> )         | S8   |
| N-CNT/rGO/CoSe <sub>2</sub> NF | 531 (0.5 A g <sup>-1</sup> )             | 264 at 10 A g <sup>-1</sup> (10000 cycles) | 151 (20 A g <sup>-1</sup> )           | S9   |
| CoSe <sub>2</sub> @NC-NR/CNT   | 699 (0.2 A g <sup>-1</sup> )             | 555 at 0.2 A g <sup>-1</sup> (100 cycles)  | 517 (5 A g <sup>-1</sup> )            | S10  |
| CNT-CoSe <sub>2</sub> @NC      | 461.7 (0.2 A g <sup>-1</sup> )           | 404 at 0.2 A g <sup>-1</sup> (120 cycles)  | 363 (5 A g <sup>-1</sup> )            | S11  |
| CNT/CoSe <sub>2</sub> /C       | 531 (0.1 A g <sup>-1</sup> )             | 396 at 0.5 A g <sup>-1</sup> (300 cycles)  | 223.6 (2.4 A g <sup>-1</sup> )        | S12  |
| CoSe <sub>2</sub> @C/CNTs      | 470 (0.2 A g <sup>-1</sup> )             | 390 at 1 A g <sup>-1</sup>                 | 373 (10 A g <sup>-1</sup> )           | S13  |

|                                        |                                     |                                                      |                                                             |                      |
|----------------------------------------|-------------------------------------|------------------------------------------------------|-------------------------------------------------------------|----------------------|
|                                        |                                     | (1000 cycles)                                        |                                                             |                      |
| <b>CoSe<sub>2</sub>@NC/MW<br/>CNTs</b> | <b>479.6 (0.2 A g<sup>-1</sup>)</b> | <b>131.5 at 5 A g<sup>-1</sup><br/>(5000 cycles)</b> | <b>227.3 mA h g<sup>-1</sup><br/>at 20 A g<sup>-1</sup></b> | <b>This<br/>work</b> |

**Table S3.** The calculated values of the equivalent circuit components for both samples.

| Samples                      | R <sub>e</sub> (Ω) | R <sub>SEI</sub> (Ω) | CPE <sub>1</sub> (F)  | R <sub>ct</sub> (Ω) | CPE <sub>2</sub> (F)  |
|------------------------------|--------------------|----------------------|-----------------------|---------------------|-----------------------|
| CoSe <sub>2</sub> @NC        | 9.59               | 418.9                | 9.74×10 <sup>-6</sup> | 27.6                | 1.55×10 <sup>-5</sup> |
| CoSe <sub>2</sub> @NC/MWCNTs | 21.13              | 19.05                | 3.29×10 <sup>-3</sup> | 39.8                | 2.59×10 <sup>-5</sup> |

**Table S4.** Values of the equivalent circuit components for CoSe<sub>2</sub>@NC/MWCNTs at different states.

| Status      | R <sub>e</sub> (Ω) | R <sub>s</sub> (Ω) | CPE <sub>1</sub> (F)  | R <sub>ct</sub> (Ω) | CPE <sub>2</sub> (F)  |
|-------------|--------------------|--------------------|-----------------------|---------------------|-----------------------|
| OCV         | 13.23              | 291.9              | 5.04×10 <sup>-6</sup> | 7.9                 | 2.44×10 <sup>-5</sup> |
| D to 1.1 V  | 9.494              | 433.5              | 4.26×10 <sup>-6</sup> | 157.6               | 3.06×10 <sup>-5</sup> |
| D to 0.8 V  | 7.395              | 487.1              | 3.36×10 <sup>-6</sup> | 141.9               | 8.21×10 <sup>-5</sup> |
| D to 0.05 V | 9.32               | 276.4              | 5.83×10 <sup>-6</sup> | 144.1               | 2.09×10 <sup>-5</sup> |
| C to 1.8 V  | 13.79              | 148.9              | 6.50×10 <sup>-6</sup> | 19.19               | 6.97×10 <sup>-6</sup> |
| C to 2.1 V  | 10.47              | 143.2              | 7.52×10 <sup>-6</sup> | 13.92               | 2.93×10 <sup>-6</sup> |
| C to 3.0 V  | 12.19              | 105.6              | 5.40×10 <sup>-4</sup> | 20.99               | 4.74×10 <sup>-6</sup> |

## References

- (S1) Y. Pan, X. Cheng, M. Gao, Y. Fu, J. Feng, L. Gong, H. Ahmed, H. Zhang, V. S. Battaglia, ACS Appl. Mater. Interfaces, 2020, **12**, 33621-33630.
- (S2) H. G. Oh, S. H. Yang, Y. C. Kang, S.-K. Park, Int J Energy Res., 2021, **45**, 17738-17748.
- (S3) J. Geng, S. Zhang, E. H. Ang, J. Guo, Z. Jin, X. Li, Y. Cheng, H. Dong, H. Geng, Mater. Chem. Front., 2021, **5**, 6873-6882.
- (S4) B. Wang, X. Miao, H. Dong, X. Ma, J. Wu, Y. Cheng, H. Geng, C. C. Li, J. Mater. Chem. A, 2021, **9**, 14582.
- (S5) B. Li, Y. Liu, X. Jin, S. Jiao, G. Wang, B. Peng, S. Zeng, L. Shi, J. Li and G.



- Zhang, *Small*, 2019, **15**, 1902881.
- (S6) T. Liu, Y. Li, S. Hou, C. Yang, Y. Guo, S. Tian and L. Zhao, *Chem.-Eur. J.*, 2020, **26**, 13716-13724.
- (S7) C. Cui, Z. Wei, G. Zhou, W. Wei, J. Ma, L. Chen and C. Li, *J. Mater. Chem. A*, 2018, **6**, 7088-7098.
- (S8) H. Ge, S. Fan, J. Liu, G. Li, *Energy Technol.* 2021, **9**, 2001074.
- (S9) M. S. Jo, J. S. Lee, S. Y. Jeong, J. K. Kim, Y. C. Kang, D. W. Kang, S. M. Jeong, J. S. Cho, *Small*, 2020, **16**, 2003391
- (S10) S.-K. Park, Y. C. Kang, *ACS Appl. Mater. Interfaces*, 2018, **10**, 17203-17213.
- (S11) S. H. Yang, S.-K. Park, Y. C. Kang, *Chem. Eng. J.*, 2019, **370**, 1008-1018.
- (S12) M. Yousaf, Y. Chen, H. Tabassum, Z. Wang, Y. Wang, A. Y. Abid, A. Mahmood, N. Mahmood, S. Guo, R. P. S. Han, P. Gao, *Adv.Sci.*, 2020, **7**, 1902907.
- (S13) Y. Tang, Z. Zhao, X. Hao, Y. Wang, Y. Liu, Y. Hou, Q. Yang, X. Wang, J. Qiu, *J. Mater. Chem. A*, 2017, **5**, 13591.
